# Supplementary material for: Young-Onset Colon Cancer and Recurrence Risk by Gene Expression
Source: PubMed Central journal article supplement — J Natl Cancer Inst. 2020 Feb 5;112(11):1170–3. doi: 10.1093/jnci/djaa019 (PMC7669228; doi:10.1093/jnci/djaa019), 2020-02-05

Supplementary Materials

Supplementary Table 1. Demographic and Disease Characteristics by Age and Stage.

| Characteristic         | Overall<br>(N=20478) | <40 years<br>(n=664) | 40-54 years<br>(n=4304) | 55-64 years<br>(n=5404) | ≥65 years<br>(n=10106) |
|------------------------|----------------------|----------------------|-------------------------|-------------------------|------------------------|
| Sex, No. (%)           |                      |                      |                         |                         |                        |
| Female                 | 10162 (49.6)         | 351 (52.9)           | 2161 (50.2)             | 2623 (48.5)             | 5027 (49.7)            |
| Male                   | 10316 (50.4)         | 313 (47.1)           | 2143 (49.8)             | 2781 (51.5)             | 5079 (50.3)            |
| Disease Stage, No. (%) |                      |                      |                         |                         |                        |
| Stage II               | 19018 (92.9)         | 619 (93.2)           | 4037 (93.8)             | 5091 (94.2)             | 9271 (91.7)            |
| Stage III              | 1460 (7.1)           | 45 (6.8)             | 267 (6.2)               | 313 (5.8)               | 835 (8.3)              |

Supplementary Figure 1. Single-gene Results by Age and Stage

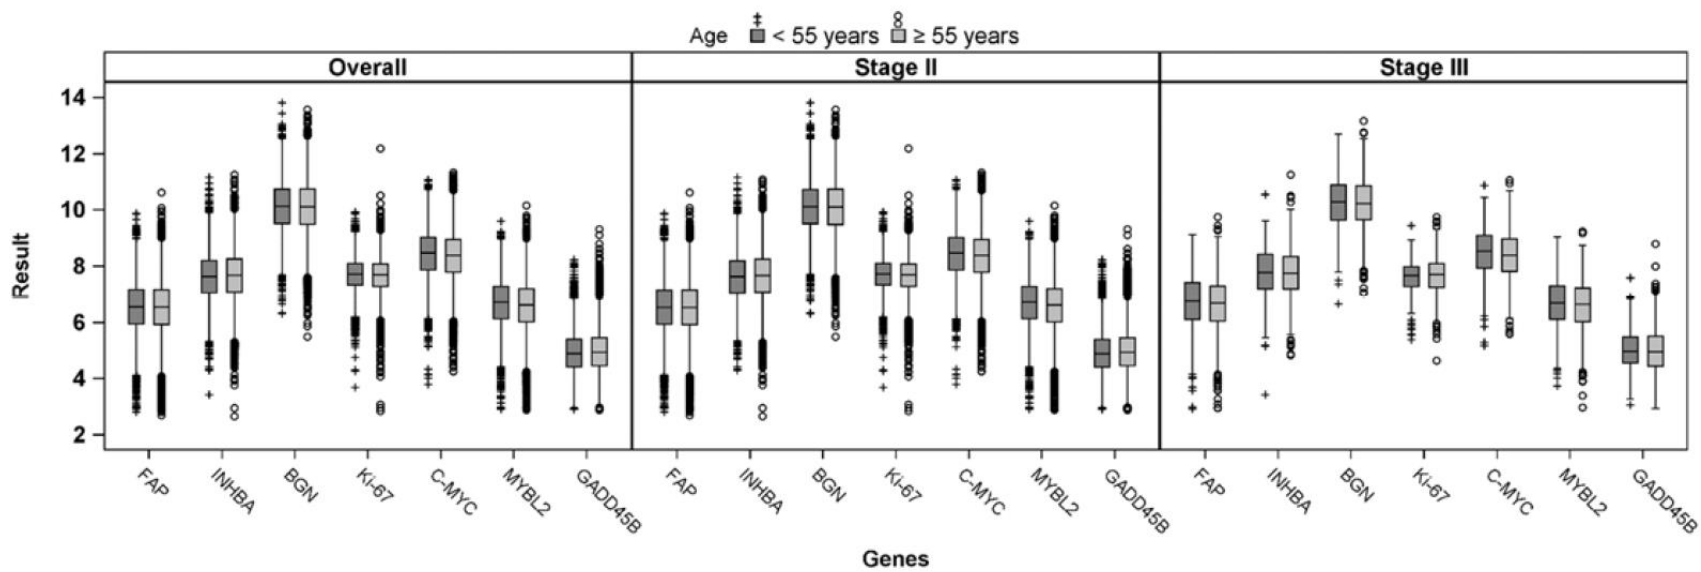

Supplement: djaa019_supplementary_data.pdf [file djaa019_supplementary_data.pdf]
